1 **Article type:** Research Paper

2

3 **Title:** Physical-biological interactions underlying the phylogeographic patterns of coral-  
4 dependent fishes around the Arabian Peninsula

5

6 **Running title:** Biophysical model of reef fishes

7

8 **Authors (names, affiliation, e-mail addresses):**

9 Felipe Torquato<sup>(1)\*</sup>, [felipe\\_o\\_torquato@hotmail.com](mailto:felipe_o_torquato@hotmail.com) (correspondence author)

10 Peter R. Møller<sup>(1,2)</sup>, [pdrmoller@snm.ku.dk](mailto:pdrmoller@snm.ku.dk)

11

12 (1) *Section for Evolutionary Genomics, Natural History Museum of Denmark,*  
13 *University of Copenhagen, Denmark.*

14 (2) *Norwegian school of Fisheries, UiT Norwegian Arctic University, Tromsø,*  
15 *Norway*

16

17

18

19

20

21

22

23

24

25

26

27

28

29

30

31

## 32 **Acknowledgements**

33 The author F.T. is supported by a CNPq/Brazil fellowship through the programme  
34 Science Without Borders (Proc. 232875/2014-6). We also thank Dr Robert Cowen  
35 (Oregon University) and Dr Luiz Rocha (California Academy of Sciences) for their  
36 helpful comments.

37

## 38 **ABSTRACT**

39 **Aim:** To test the hypothesis that phylogeographic pattern of coral-dependent fish species  
40 inhabiting the Arabian Peninsula may be driven by a combination of ocean circulation,  
41 larval behavior and seascape features.

42 **Location:** The present study focuses on three such putative oceanographic barriers  
43 around the Arabian Peninsula: the Bab el-Mandeb Strait, the Strait of Hormuz and the  
44 upwelling off Oman.

45 **Taxa:** Multitaxa.

46 **Methods:** A biophysical modeling system that relies on stochastic Lagrangian framework  
47 and Individual-Based Model was used to simulate larval dispersal through the three  
48 putative barriers, by tracking three-dimensional movements of virtual particles in ocean  
49 circulation scenarios. We explored the range of dispersal capabilities across reef fish  
50 species by creating 72 hypothetical strategies, each representing a unique combination of  
51 five biological traits: pelagic larval duration, spawning periodicity, mortality rate,  
52 reproductive output and vertical migration.

53 **Results:** Our results showed that the strength of the barriers was highly variable as a  
54 function of all biological traits (except reproductive output) and indicated high  
55 asymmetry of connectivity, and hence gene flow, between adjacent areas. In addition,  
56 direction and distance travelled by the virtual larvae varied according to both the  
57 geographic position of releasing site and biannual monsoonal winds. On average, larvae  
58 released during the summer exhibited a higher potential for dispersal than larvae released  
59 in wintertime.

60 **Main conclusions:** Our biophysical models complement the few existing empirical  
61 research on population genetics, and the predictions presented here serve as testable  
62 hypotheses for future phylogeographic studies around the Arabian Peninsula.

63

64 **KEYWORDS:** Biophysical modeling, Bab el-Mandeb Strait, connectivity, connectivity  
65 modeling system, Strait of Hormuz, upwelling off Oman.

66

## 67 **INTRODUCTION**

68 The Arabian Peninsula lies on a hyper-arid region in the Southwest Asia at the  
69 junction of this continent with Africa (Figure 1). The water-mass distribution and upper-  
70 ocean circulation surrounding the peninsula change in correspondence with biannual  
71 wind reversals, which creates seasonality in oceanographic conditions (Cutler &  
72 Swallow, 1984; Shetye et al., 1994). During the NE monsoon in the winter (November -  
73 March), the wind blows away from Asian continent, and the ocean surface circulation in  
74 the Arabian Sea is approximately counter-clockwise. On the other hand, during the  
75 summer SW monsoon (May-September) the wind reverses and blows strongly, so that the  
76 circulation in the Arabian Sea is clockwise. March-April and October are transition  
77 periods and winds are weak (see Cutler & Swallow, 1984).

78 Large seasonal variations of such magnitude, which is generally not found  
79 elsewhere (Shetye et al., 1994), plays a critical role for distribution of fish and other  
80 marine biodiversity by transporting or disrupting the movements of their larvae (Cowen,  
81 2002). Thereby, the direction and magnitude of prevailing currents can spread out species  
82 distribution by aiding the dispersal of the propagules to future habitats. Nevertheless,  
83 these currents may also act as barriers by minimizing long-distance larval dispersal (Paris  
84 & Cowen, 2004), which ultimately may explain either the existence of endemic species  
85 (Cowen et al., 2000) or genetic discontinuities across species ranges (Bowen et al., 2016).  
86 Although large expanses of ocean waters are the most notable permeable barriers for  
87 larval dispersal (Bowen et al., 2016), mesoscale oceanographic processes such as fronts  
88 (Galarza et al., 2009), river runoffs (Rocha, 2003), and upwellings (Lett et al., 2007) also  
89 acts as barriers to marine faunal connectivity. The permeability of these so-called semi-  
90 permeable barriers is taxon-specific and, therefore, affected by biological traits (Ayre et  
91 al., 2009).

92 At the Arabian Peninsula, zoogeographic and population genetic studies on coral-  
93 dependent fishes have shown discontinuities in both species and genetic distributions  
94 along the seas surrounding the peninsula (Burt et al., 2011; DiBattista, Roberts, et al.,  
95 2016; Berumen et al., 2017). The most remarkable of these discontinuities, distinguishes  
96 the fish fauna from each side of the peninsula (DiBattista, Choat, et al., 2016). Two other  
97 discontinuities in species compositions are observed, one between the Red Sea and the  
98 adjacent Gulf of Aden through the Bab el-Mandeb Strait, and another between the  
99 Arabian/Persian Gulf (henceforth referred as the Gulf) and the adjacent Sea of Oman  
100 through the Strait of Hormuz (DiBattista, Roberts, et al., 2016). These boundaries  
101 described by multispecies distribution records, are also logical places in relation to  
102 present-day barriers for gene flow between populations (Baums et al., 2006). Indeed,  
103 population genetic studies carried out in the Northwestern Indian Ocean (NIO) have  
104 revealed similarities in the geographical position of barriers previously proposed  
105 (DiBattista et al., 2013, 2015, 2017; Nanninga et al., 2014; Priest et al., 2016; Saenz-  
106 Agudelo et al., 2015; Torquato et al., 2019).

107 Hypotheses to explain the distribution of genetic diversity in the Arabian  
108 Peninsula usually rely on parapatric speciation pattern, which resulted from either  
109 repeated vicariance events caused by lowering sea level during the last glaciation, or  
110 ecological speciation due to the large spatial gradients and temporal fluctuations in  
111 physical conditions across the peninsula (DiBattista, Roberts, et al., 2016; DiBattista,  
112 Choat, et al., 2016; Nanninga et al., 2014). An alternative hypothesis has been attributed  
113 to the seasonal upwelling in the Arabian Sea off Oman, which creates unsuitable  
114 condition for discrete coral-habitat growth along southern Omani coast (Sheppard &  
115 Salm, 1988) and hence potentially restrict stepping-stone connectivity between both sides  
116 of the Arabian Peninsula. In turn, little attention has been given to test hypotheses where  
117 the combination of seascape features, ocean circulation and larval traits underling the  
118 genetic patterns observed among coral-dependent fishes inhabiting the Arabian  
119 Peninsula.

120 In numerous cases, hypotheses in marine ecology are prohibitively time  
121 consuming and expensive to be empirically tested, largely owing to the impossibility of  
122 capturing the full range of temporal and spatial fine-scale resolution required to make  
123 inferences (Cowen & Sponaugle, 2009). Although a more comprehensive picture is

124 emerging in the Arabian Peninsula with respect to marine phylogeographic and  
125 population genetic patterns (Berumen et al., 2017; DiBattista, Roberts, et al., 2016;  
126 DiBattista, Choat, et al., 2016), the processes affecting larval dispersal across the putative  
127 barriers are not yet fully understood due to the paucity of empirical studies. In addition,  
128 political realities of some countries bordering the Western Indian Ocean (WIO) have  
129 limited access to scientists, hindering a more complete perspective of general  
130 phylogeography in the region (Berumen et al., 2017). In such cases, if limited empirical  
131 data are available, reliable computational models can be used to make field predictions  
132 and advance our knowledge to designing future experiments for hypothesis testing  
133 (Cowen & Sponaugle, 2009).

134 Advances on physical circulation models enabled the investigation of population  
135 connectivity by running semi-realistic simulations of virtual particles. Here we used high-  
136 resolution ocean circulation model (Hybrid Coordinate Ocean Model - HYCOM) to  
137 design a biophysical model in a Lagrangian stochastic scheme (Paris et al., 2013). The  
138 main goal of this study is to simulate multitaxon larval dispersal through the marine  
139 barriers, and thus provide insights on processes and patterns of connectivity leading to the  
140 distribution of genetic diversity of coral-dependent fishes around the Arabian Peninsula.  
141 Specifically, we shed light on three questions: (1) what biological attributes affect the  
142 larval dispersal through the Bab el-Mandeb Strait and Strait of Hormuz? (2) What is  
143 impact of the upwelling off Oman on the larval connectivity between both sides of the  
144 peninsula? (3) How does oceanographic variability, due to the seasonal monsoon, affect  
145 larval dispersal pattern (i.e. direction and magnitude travelled by the particle)? Our  
146 results provide detailed predictions that can be compared to previous and future empirical  
147 studies on the distribution of biodiversity in the Arabian Peninsula.

148

## 149 **MATERIAL AND METHODS**

### 150 **Biophysical Model and Larval Dispersal Simulation**

151 Idealized dispersal of fish larvae is modeled using an open-source program,  
152 Connectivity Modelling System (CMS v. 2.0; Paris et al., 2013), which is a biophysical  
153 modeling system based on stochastic Lagrangian framework and Individual-Based Model  
154 (IBM) that couple ocean current, GIS-based habitat, and biological traits. In brief, CMS  
155 uses information on currents and environmental conditions to simulate both deterministic  
156 fourth-order Runge-Kutta and/or stochastic displacements of a large number of virtual  
157 particles (hereafter called larvae), through space and time. In order to explore the range of  
158 dispersal capabilities across reef fishes, we created 72 hypothetical strategies each of  
159 those representing a unique combination of five biological traits that may influence the  
160 connectivity: pelagic larval duration (PLD), spawning periodicity, mortality rate,  
161 reproductive output and vertical migration (Table 1).

162

### 163 **Hydrodynamic model**

164 We use the CMS package *getdata* to download daily ocean current velocities from  
165 the three-dimensional and eddy-resolving Hybrid Coordinate Ocean Model (HYCOM,  
166 GLBa0.08) from 2014 to 2016. The model has a horizontal resolution of ca. 9 km grid  
167 ( $1/12^\circ$ ), and is set up in a nested domain ( $0^\circ - 30^\circ$  N,  $31^\circ - 70^\circ$  E), comprising all layers  
168 from the surface up to 100 meters depth.

169

170 **GIS-based Seascape module**

171 The GIS serves to delineate the source and recruitment habitats. Suitable releasing  
172 (source habitat) and settlement (sink habitat) locations are delineated in QGIS v.2.18 by  
173 creating a vector grid that overlaid the distribution of coral reefs data from the UNEP-  
174 WCMC (2010). A total of 181 polygons (~ 18km x 18km) representing coral reef habitats  
175 are placed along coastal areas within our model domain.

176

177 **Biological module**

178 We assume spatial homogenous reproductive output across the habitats and,  
179 therefore, all the 181 polygons are set to release from their center the same number of  
180 larvae per ‘spawning’ event. However, we contrast scenarios where reproductive output  
181 varies among species. In scenarios of high reproductive output, a hundred larvae are  
182 released from each polygon, whereas in low reproductive output conditions only ten are  
183 released. Here, three seasonal spawning preferences are accounted by simulating the  
184 larval dispersal annually according to the two dominant seasonal oceanographic  
185 conditions around the Arabian Peninsula. After being released, the larvae are let to drift  
186 over a period of 20, 30 or 40 days, corresponding to the typical pelagic larvae duration  
187 (PLD) of most coral reef fish species/families (Lindeman et al., 2005; Thresher and  
188 Brothers 1985).

189 In this study the PLD is equally divided into the three ontogenetic larval stages,  
190 namely: preflexion, flexion and postflexion. Due to the paucity of basic data regarding  
191 fish larvae distribution within our study area, the model incorporates an idealized pattern  
192 of ontogenetic vertical migration for the three larval stages (see Appendix S1 in  
193 Supporting Information). This idealization assumes the existence of a global ontogenetic  
194 trend of the fish larvae to display downward ontogenetic shift in vertical distribution  
195 (Irisson et al., 2010). During the postflexion stage the larvae are considered competent to  
196 settle if they are inside one of the 181 reef sites. In order to assess the importance of  
197 vertical migration, which potentially allow the larvae to avoid passive advection in  
198 vertically stratified scenarios and increase the chance of retention (Paris & Cowen, 2004),  
199 we also contrasted both epipelagic ichthyoplankton moving only horizontally along the  
200 sub-surface layer and larvae that, besides the horizontal displacement, also move  
201 vertically according to its ontogeny (Figure S1).

202 Little is known regarding larval mortality in the ocean. To accommodate this  
203 uncertainty, our study includes two levels of mortality based on the half-life, such that  
204 approximately 50% of unsettled larvae would be surviving after half the maximum PLD  
205 (Holstein et al., 2014; Paris et al., 2013). Thus, we determines that in high mortality  
206 scenario about half of the larvae die by the end of the preflexion stage, while in low  
207 mortality condition half of the larvae dies by the end of the postflexion stage (Table 1).

208

209 **Particle-tracking module**

210 Stochastic IBM Lagrangian model tracks offline over 157 millions larvae around  
211 the Arabian Peninsula for the 72 hypothetical strategy. A total of 86,011,200 larvae are  
212 released to mimic taxa spawning throughout year, whereas 35,838,000 larvae are tracked  
213 to simulate taxa spawning on either winter monsoon (November 2014 – March 2015) or  
214 summer monsoon (May 2015 – September 2015).

215 Preliminary sensitive analysis showed no significant difference in the settlement  
216 proportion when seeding 100 larvae from the 181 polygons at every either 3 or 24 hours  
217 (see Appendix S1). Therefore, the larvae are released from each reef at every 24 hours,  
218 which represents a spawning event. This uniform temporal distribution of larvae allows  
219 us to assess the effects of the hydrographic variability conditions on larval dispersal (e.g.,  
220 extreme events, perturbation, and instability). Throughout the PLD, the position of each  
221 larva is updated every 6 h time-step, and the trajectory information (i.e. longitude,  
222 latitude, depth) is saved to output in intervals of 24 hours. We account for diffusive  
223 turbulent motion by adding a horizontal diffusion coefficient. The value of  $50 \text{ m}^2 \cdot \text{s}^{-1}$  was  
224 chosen from a sensitivity test where 100 larvae were released from the 181 polygons at  
225 every 24 hours (see Appendix S1).

226

## 227 **Analyses**

228 The proportion of survivor larvae that were released from each region  $i$  and  
229 successfully settled in a downstream habitat patch (i.e., sink habitat) at region  $j$ , is  
230 plotted as a connectivity matrix. Self-recruitment, i.e. larvae settling within its  
231 release location, is represented by the diagonal of the matrix. In order to evaluate  
232 the strength and direction of the potential connections on regional scale (e.g.,  
233 between Red Sea and Gulf of Aden), all cells from each region are merged.

234

## 235 **Biological traits vs. biogeographic barriers**

236 To evaluate the effect of the biological traits highlighted in Table 1 on the  
237 putative barriers, we rely on a multiple regression approach. Specifically, the effects  
238 of both Bab-el-Mandeb and Hormuz strait are measured in terms of permeability,  
239 which considers the proportion of surviving larvae that are released from a source  
240 habitat, passed through the strait, and successfully settled on the other side. In turn,  
241 the effect of the upwelling off Oman is measured in terms of self-recruitment  
242 proportion along the Arabian Sea. At the region off Oman, we hypothesized that  
243 higher self-recruitment represent higher retention of larvae on continental shelf,  
244 and thus greater chance of connectivity. By contrast, we assume that lower self-  
245 recruitment is due to larval movement toward offshore as a consequence of Ekman  
246 transport, hence decreasing the change of the larvae to find suitable habitat for  
247 settlement (but see Morgan et al., 2012).

248 Provided that the proportion is a continuous variable that can take on values  
249 restricted to the interval between 0 and 1, a beta regression model as proposed by  
250 Ferrari & Cribari-Neto (2004) is used through the *betareg* R-package (Cribari-Neto  
251 & Zeilis, 2010). The beta regression is essentially similar to a Generalized Linear  
252 Model (GLM), where it describes the relationship between the response variable  $Y_i$   
253 (hereby, proportions) and the predictors  $X_i$  (Table 1) through a linear predictor  $\eta_i$ .  
254 This linear predictor is then linked to the mean of the response  $E(Y_i) = \mu_i$  by means of a  
255 link function  $g$ , such that  $g(\mu_i) = \eta_i$ . In this way, the applied model can be summarized  
256 as:

257

258

259

260

$$Y_i \sim B(\mu_i, \phi)$$
$$\text{logit}(\mu_i) = \eta_i$$
$$\eta_i = \beta_0 + \beta_1 \text{PLD} + \beta_2 \text{SP} + \beta_3 \text{M} + \beta_4 \text{R} + \beta_5 \text{VM} + \varepsilon$$

261

262 Where  $\phi$  is the precision parameter;  $\eta_i$  the linear predictor expressed on a logit scale;  $\beta_0$   
263 the intercept;  $\beta_1$ -5 the repressors related to each explanatory variable (PLD=Pelagic  
264 larval duration, SP = Spawning periodicity, M = Mortality, R = Reproductive output, VM  
265 = Vertical migration); and  $\varepsilon$  represents the error term. Model assumptions like residual  
266 homocedasticity, independence and normality are accessed through conventional  
267 graphical checks as mentioned in Zuur et al. (2010).

268

### 269 Larval dispersal pattern and oceanographic conditions

270

271 The maximum distances travelled by the larvae around the Arabian Peninsula are  
272 calculated by setting up a model with the lowest mortality rate and 40-days PLD. We use  
273 the program QGIS v.2.18 to measure this distance and compare the results in both  
274 summer and winter, as well as in each of the regions within the model domain.

274

## 275 RESULTS

276

### 276 Connectivity matrix

277

278 All the matrices representing the 72 hypothetical strategies revealed that  
279 connectivity occurred exclusively between neighbor regions (Figure S2 – S4). The  
280 hardest putative barrier was observed off Oman, which separates both sides of the  
281 Arabian Peninsula. Thereby, larvae that were released from the Arabian Sea, the Sea of  
282 Oman or the Gulf, rarely reached the reefs in the Gulf of Aden or the Red Sea, and vice-  
282 versa.

283

284 In turn, the connectivity through both the Bab el-Mandeb Strait and the Strait of  
285 Hommuz were not symmetric. Instead, the strength and symmetry of the connections  
286 varied either seasonally or due to larval traits. For example, for 7 strategies in which the  
287 larvae were released from the Red Sea, the larvae did not reach the reefs located in the  
288 adjacent Gulf of Aden. Likewise, for 5 strategies where larvae were released from the  
289 Sea of Oman, the larvae were not able to cross the Strait of Hommuz and settle onto reefs  
290 in the Gulf. In the former example, the thorough larval retention in the Red Sea occurred  
291 only in the winter and irrespective of the PLD. The second example, on the other hand,  
292 was only observed for the shortest PLD but irrespective of seasonality.

292

### 293 Effects of the biological traits on the permeability of biogeographic barriers

294

295 Graphical evaluation of the model assumptions revealed that all tested models  
296 fitted well to the data, with residuals following both homoscedasticity and normality  
297 assumptions. The numerical outputs of the models are summarized in table S1 and  
298 discussed in more detail below.

298

### 299 Bab el-Mandeb Strait

300

301 For the larvae that were released from the Red Sea and successfully settled in the  
302 Gulf of Aden, only the larval reproductive output was not significant (Table S1, Figure  
303 2). The beta regression showed that the connectivity in this direction was significantly  
303 higher during the summer than winter, such that larvae experiencing high mortality in

304 winter and that did not performed vertical migration, could not settle on the Gulf of Aden  
305 (Figure S2-S4). The permeability of the barrier in this direction was higher for larvae that  
306 performed vertical migration and were left to drift for longer periods, though no  
307 significant difference was observed between larvae that drift for 30 and 40 days.

308 On the other hand, larvae moving in the opposite direction, from the Gulf of Aden  
309 to the Red Sea, always crossed the Bab el-Mandeb Strait and settled on the other side.  
310 The higher success in the connection occurred during the wintertime, and although the  
311 larval reproductive output did not change the barrier's permeability (Table S1, Figure 2),  
312 a positive relationship was observed between the permeability and higher PLD and no  
313 vertical migration. Mortality rate was also significant and displayed the same tendency of  
314 the larvae moving from the Red Sea and to the Gulf of Aden.

315

### 316 **Strait of Hormuz**

317 The larvae release from the Gulf always reached the Sea of Oman. The proportion  
318 of larvae settling released in the second increased when they were released throughout  
319 the year or during the wintertime, performed vertical migration, had low mortality rate,  
320 and travelled for longer period (Table S1, Figure 3). Nevertheless, the chance of the  
321 larvae to cross the strait in this direction did not depend on the reproductive output.

322 Likewise, among all biological attributes, only reproductive output was not  
323 significant for larvae that were released from the Sea of Oman, crossed the Strait of  
324 Hormuz and successfully settled in the Gulf. The probability of this connectivity was  
325 higher in the scenarios where the larvae were release in winter, had low mortality rate,  
326 did not perform vertical migration and remained in the planktonic environment for longer  
327 period. (Table S1, Figure 3). Importantly, 20-days PLD larvae, presenting high mortality  
328 and that performed vertical migration, did not cross the Strait of Hormuz (Figure S2).

329

### 330 **Upwelling off Oman**

331 All biological traits, except larval reproductive output, significantly affected the  
332 proportion of self-recruitment in the Arabian Sea (Table S1, Figure 4). The scenario  
333 where the strategy had higher success in self-recruitment, and hence higher potential for  
334 connectivity, occurred during the wintertime or throughout year, and if the 20-days PLD  
335 larvae performed ontogenetic migration under low mortality scenario. In turn, larvae  
336 produced during the summer, when the Ekman transport takes place, had a slightly higher  
337 chance to be displaced to areas of unsuitable habitats.

338

### 339 **Particles trajectories: seasonal variability of spatial scale and direction**

340 The direction and distance travelled by the larvae were highly variable as a  
341 function of both the geographic position of releasing site and the biannual monsoonal  
342 winds (Figure 5 and 6). On average, larvae released during the summer exhibited a higher  
343 potential for dispersal, especially in areas that are not enclosed (Figure 5f, 6f). It was in  
344 summer that the movement of larvae southward from the Red Sea was more pronounced,  
345 and it was also in this season that many larvae released in the Gulf of Aden reached  
346 Omani waters in the Arabian Sea. In turn, during the winter the vast majority of larvae  
347 originating in the Red Sea were retained within this area, while larvae released within the  
348 Gulf of Aden either moved eastward, though rarely reaching the Omani coast, or moved  
349 southward along the Somali coast.



350 In the Arabian Sea, surface circulation exhibited a strong seasonal cycle. During  
351 the summer, larvae released along the Omani coast between 54.6° E and 56.1° E, either  
352 moved eastward alongshore toward the Sea of Oman or sharply turned toward the open  
353 ocean. Whereas, larvae released between 57.8° E and 59° E were exclusively transported  
354 alongshore toward the Sea of Oman (Figure S5). In the winter, even though the larvae  
355 along the entire Omani coast moved toward offshore, on average they travelled shorter  
356 distances compared to the summer (Figure 5f, 6f).

357 On the east side of the Arabian Peninsula, the temporal variability of both the  
358 direction and the distance travelled by the larvae was less evident. In the Sea of Oman,  
359 larvae released from the eastern Omani coast tended to move southward and few larvae  
360 reached the Gulf. However, those larvae originating on the top of the Sea of Oman were  
361 able to pass through the Strait of Hormuz, though they did not travel far away. In the Gulf  
362 the patterns of dispersal observed in both seasons were quite similar, larvae tended not to  
363 move far away and hence most of them remained in the Gulf.

364

## 365 **DISCUSSION**

366 Measuring the strength of barriers has been a great challenge to understand phylo-  
367 and bio-geographic patterns (Treml et al., 2015). In our study, a series of individual-  
368 based simulations were performed to assess the permeability of larvae of 72 hypothetical  
369 taxa through three putative barriers. This ‘multitaxa’ comparison demonstrated how  
370 biological-physical interactions determine the success of propagules being transported  
371 through the Bab el-Mandeb Strait and the Strait of Hormuz, as well as of those being self-  
372 replenished off Oman. Here, we hypothesized that coupling hydrodynamic, seascape  
373 features and larval traits, potentially contribute to the distribution of genetic lineages  
374 since the connectivity rate, as shown in this study, represents a proxy of gene flow.  
375 Therefore, we assumed that the absence, strong reduction or asymmetry of larval  
376 exchange through the putative barriers affects the phylogeographic pattern around the  
377 Arabian Peninsula.

378 Given the aim of our study, we took advantages of a Lagrangian three-  
379 dimensional approach to assess the effects of the hydrographic variability conditions  
380 (e.g., extreme events, perturbation, instability) on larval dispersal. Lagrangian models,  
381 although more realistic, have computational requirements that make impossible to release  
382 a real number of larvae per species. Alternatively, Eulerian advection-diffusion methods,  
383 though are not spatially realistic, have a large impact on dispersal kernel and hence are  
384 suitable in quantifying evolutionarily significant tails in evolutionary connectivity studies  
385 (Treml et al., 2012).

386 Our results showed that the hardest putative barrier was that positioned off Oman,  
387 with scenarios exhibiting weak or none connectivity between the Arabian Sea and its  
388 adjacent areas. This result corroborates with previous population genetic studies. For  
389 example, phylogeographic investigations on fish species such as *Scomberomorus*  
390 *commerson* (van Herwerden et al., 2006); *Cephalopholis hemistiktos* (Priest et al., 2016)  
391 and *Pomacanthus maculosus* (Torquato et al., 2019), used different genetic markers and  
392 found a significant discontinuity positioned in southern Oman. Moreover, in our models  
393 the strength of this barrier increased when the taxa are spawning during the summer  
394 monsoon. And this prediction is in accordance with the gonado-somatic index (GSI)  
395 values for the three species mentioned above, i.e., *S. commerson* (Kaymaram et al.,

396 2010); *C. hemistiktos* (Priest et al., 2016) and *P. maculosus* (Grandcourt et al., 2010),  
397 which indicate that they spawn mainly in this season. By contrast, among six other  
398 exploited finfish species inhabiting the Omani coast, only one (*Epinephelus diacanthus*)  
399 also revealed higher GSI values during the onset of the summer monsoon period  
400 (McIlwain et al., 2006).

401 The main hypotheses to explain faunal and genetic differences between both sides  
402 of the peninsula usually involve seascape features and/or ocean circulation off Oman  
403 (Torquato et al. 2019). The seascape is characterized by coral colonies in southern  
404 Omani coast being weakly developed and represented by a reduced number of species  
405 (Burt et al., 2016; Sheppard & Salm, 1988), such that the lack of coral-habitat creates an  
406 unbridgeable gap for coral-dependent species (Priest et al., 2016). In turn, the ocean  
407 circulation explanation relies on studies involving small pelagic fishes, which suggest  
408 that upwelling systems hindrance connectivity by displacing larvae offshore due to  
409 Ekman transport (Parrish et al., 1981; but see Morgan et al., 2012). The Benguela  
410 upwelling system, for example, acts as a barrier to some species of phytoplankton,  
411 copepods and pelagic fishes between North and South (Lett et al., 2007).

412 Regarding the straits, our biophysical models showed an asymmetric movement  
413 thought both the Bab el-Mandeb Strait and the Strait of Hormuz. The strength of the first  
414 is in accordance with the seasonal water exchange pattern between the Red Sea and Gulf  
415 of Oman. The water flow through the Bab el-Mandeb Strait changes from a two-layer  
416 surface flow in the winter to a three-layer flow in the summer (Smeed, 2004). Thus,  
417 vertical migration combined with seasonal spawning play a critical role in the  
418 connectivity (Paris & Cowen, 2004), by positing the larvae in one or another prevailing  
419 current. For example, although larvae released from the Gulf of Aden always reached the  
420 Red Sea, larvae released from the second and that did not exhibit vertical migration,  
421 increased their retention significantly within this sea during the winter. Although  
422 ichthyoplankton surveys in the Red Sea indicated that the vast majority of fish taxa  
423 inhabiting the Red Sea spawn mainly during spring and summer (e.g., *Amphiprion*  
424 *bicinctus*) a few species actually spawn in the winter (El-Regal, 2013) and hence their  
425 larvae are subject to being retained regardless their PLD.

426 Investigations performed hitherto have not showed genetic discontinuities of  
427 species through the Bab el-Mandeb Strait, including fishes *A. bicinctus* (Saenz-Agudelo  
428 et al., 2015); *C. hemistiktos* (Priest et al. 2016); *P. maculosus* (Torquato et al., 201);  
429 *Chaetodon* spp. (DiBattista et al., 2020) and sea anemones (Emms et al., 2019). In fact,  
430 the strength of the barrier has been mainly debated based on the species distribution  
431 studies. Kemp (1998) suggested that although the Bab el-Mandeb Strait was a site of a  
432 significant Pleistocene vicariance event, it does not act as a present-day barrier.  
433 According to the author, the paucity of information about the reef fish assemblage  
434 inhabiting the southern Red Sea and the adjacent Gulf of Aden is the main reason for the  
435 hypothesis that the strait acts as a present-day barrier.

436 In the Strait of Hormuz, in turn, larvae exhibiting short PLD, experiencing high  
437 mortality, and especially those performing vertical migration, displayed great chance of  
438 not crossing the strait when released from the Sea of Oman. This combination of  
439 biological traits is likely observed in the study area, since the extreme thermal condition  
440 in the region may shorten PLDs, or even induce larvae to experience high mortality rates  
441 (Munday et al., 2009). Therefore, the consequent reduction in spatial scale of

442 connectivity due to physical-biological interactions may be underling genetic  
443 differentiation between the adjacent populations, by reducing gene flow to levels that are  
444 unable to overcome local differentiations.

445 There are few evidences of the Strait of Hormuz acting as a barrier for coral-  
446 associated fauna. Weak genetic discontinuity between the Gulf and the adjacent Sea of  
447 Oman has been shown for a coral species *Platygyra daedalea* (Howells et al., 2016),  
448 which spawn mainly from February to May (Bauman et al., 2011), and a sea urchin  
449 *Echinometra* sp. (Ketchum et al., 2020), whose PLD within the genus vary from 18 to 30  
450 days (McClanahan & Muthiga, 2007). On the other hand, population genetics studies  
451 showed that for reef fish species, such as *C. hemistiktos* (Priest et al., 2016) and *P.*  
452 *maculosus* (Torquato et al., 2019), the Gulf and the Sea of Oman represent a single  
453 phylogeographic province.

454

## 455 **Conclusion**

456 Our biophysical models complement the existing research on comparative fish  
457 population genetics by providing a snapshot of the present-day seascape permeability  
458 around the Arabian Peninsula. The comparative and cross-taxon models could identify  
459 key biological traits and biophysical interactions that limit the transport of  
460 ichthyoplankton in our study area. The predictions presented here serve as testable  
461 hypotheses for future studies on population genetics, especially demographic models  
462 focusing on symmetry of gene flow, and fish larval distributions around the Arabian  
463 Peninsula.

464

## 465 **References**

- 466 Ayre, D. J., Minchinton, T. E., & Perrin, C. (2009). Does life history predict past and  
467 current connectivity for rocky intertidal invertebrates across a marine  
468 biogeographic barrier? *Molecular Ecology*, 18, 1887–1903.
- 469 Bauman, A. G., Baird, A. H., & Cavalcante, G. H. (2011). Coral reproduction in the  
470 world's warmest reefs: southern Persian Gulf (Dubai, United Arab Emirates).  
471 *Coral Reefs*, 30, 405-413.
- 472 Baums, L. B., Paris, C. B., & Chérubin, L. M. (2006). A bio-oceanographic filter to larval  
473 dispersal in a reef-building coral. *Limnology and Oceanography*, 51, 1969-1981.
- 474 Berumen, M. L., DiBattista, J. D., & Rocha, L. A. (2017). Introduction to virtual issue on  
475 Red Sea and Western Indian Ocean biogeography. *Journal of Biogeography*, 44,  
476 1923–1926.
- 477 Bowen, B. W., Gaither, M. R., DiBattista, J. D., Iaccheia, M., Andrews, K. R., Grant, W.  
478 S., Toonen, R. J., & Briggs, J. C. (2016). Comparative phylogeography of the  
479 ocean planet. *Proceedings of the National Academy of Sciences*, 113, 7962–7969.
- 480 Burt, J. A., Feary, D. A., Bauman, A. G., Usseglio, P., Cavalcante, G. H., Sale, & P. F.  
481 (2011). Biogeographic patterns of reef fish community structure in the  
482 northeastern Arabian Peninsula. *ICES Journal of Marine Science*, 68, 1875–1883.
- 483 Burt, J. A., Coles, S., van Lavieren, H., Taylor, O., Looker, E., & Samimi-Namin, K.  
484 (2016). Oman's coral reefs: A unique ecosystem challenged by natural and man-  
485 related stresses and in need of conservation. *Marine Pollution Bulletin*, 105, 498-  
486 506.

- 487 Cowen, R. K., Lwiza, K. M. M., Sponaugle, S., Paris, C. B., & Olson, D. B. (2000).  
488 Connectivity of Marine Populations: Open or Closed? *Science*, 287, 857-859.
- 489 Cowen, R. K. (2002). Larval dispersal and retention and consequences for population  
490 connectivity. In Sale, P. F. (Ed.), *Coral reef fishes: dynamics and diversity in a*  
491 *complex ecosystem* (pp. 149-170). Academic Press.
- 492 Cowen, R. K., & Sponaugle, S. (2009). Larval Dispersal and Marine Population  
493 Connectivity. *Annual Review of Marine Science*, 1, 443–466.
- 494 Cribari-Neto, F., & Zeileis, A. (2010). Beta Regression in R. *Journal of Statistical*  
495 *Software*, 34, 1–24.
- 496 Cutler, A. N., & Swallow, J. C. (1984). Surface currents of the Indian Ocean (to 25S,  
497 100E): compiled from historical data archived by the Meteorological Office,  
498 Institute of Oceanographic Sciences.
- 499 DiBattista, J. D., Berumen, M. L., Gaither, M. R., Rocha, L. A., Eble, J. A., Choat, J. H.,  
500 ... Bowen, B. W. (2013). After continents divide: comparative phylogeography of  
501 reef fishes from the Red Sea and Indian Ocean. *Journal of Biogeography*, 40,  
502 1170 – 1181.
- 503 DiBattista, J. D., Waldrop, E., Rocha, L. A., Craig, M. T., Berumen, M. L., & Bowen, B.  
504 W. (2015). Blinded by the bright: A lack of congruence between colour morphs,  
505 phylogeography and taxonomy for a cosmopolitan Indo - Pacific butterflyfish,  
506 *Chaetodon auriga*. *Journal of Biogeography*, 42, 1919-1929.
- 507 DiBattista, J. D., Roberts, M. B., Bouwmeester, J., Bowen, B. W., Coker, D. J., Lozano-  
508 Cortes, D. F., ... Berumen, M. L. (2016). A review of contemporary patterns of  
509 endemism for shallow water reef fauna in the Red Sea. *Journal of Biogeography*,  
510 43, 423–439.
- 511 DiBattista, J. D., Choat, J. H., Gaither, M. R., Hobbs, J. A., Lozano-Cortes, D. F., Myers,  
512 R. F., ... Berumen, M. L. (2016). On the origin of endemic species in the Red  
513 Sea. *Journal of Biogeography*, 43, 13–30.
- 514 DiBattista, J. D., Gaither, M. R., Hobbs, J. A., Saenz-Agudelo, P., Piatek, M. J., Bowen,  
515 B. W., ... Berumen, M. L. (2017). Comparative phylogeography of reef fishes  
516 from the Gulf of Aden to the Arabian Sea reveals two cryptic lineages. *Coral*  
517 *Reefs*, 36, 625–638.
- 518 DiBattista, J. D., Saenz-Agudelo, P., Piatek, M. J., Cagua, E. F., Bowen, B. W., Choat, J.  
519 H., ... McIlwain, J. H. (2020). Population genomic response to geographic  
520 gradients by widespread and endemic fishes of the Arabian Peninsula. *Ecology*  
521 *and Evolution*, 10, 4314-4330.
- 522 El-Regal, M. A. (2013). Spawning seasons, spawning grounds and nursery grounds of  
523 some Red Sea fishes. *The Global Journal of Fisheries and Aqua*, 6, 105-125.
- 524 Elliott, A. J., & Savidge, G. (1990). Some features of the upwelling off Oman. *Journal of*  
525 *Marine Research*, 48, 319-333.
- 526 Ferrari, S., & Cribari-Neto, F. (2004). Beta Regression for Modelling Rates and  
527 Proportions. *Journal of Applied Statistics*, 31, 799-815.
- 528 Galarza, J. A., Carreras-Carbonell, J., Macpherson, E., Pascual, M., Roques, S., Turner,  
529 G. F., & Rico, C. (2009). The influence of oceanographic fronts and early-life-  
530 history traits on connectivity among littoral fish species. *Proceedings of the*  
531 *National Academy of Sciences*, 106, 1473-1478.

- 532 Grandcourt, E., Al Abdessalaam, T. Z., Francis, F., & Al Shamsi, A. (2010). Age-based  
533 life history parameters and status assessments of by-catch species (*Lethrinus*  
534 *borbonicus*, *Lethrinus microdon*, *Pomacanthus maculosus* and *Scolopsis*  
535 *taeniatus*) in the southern Arabian Gulf. *Journal of Applied Ichthyology*, 26, 381-  
536 389.
- 537 Holstein, D. M., Paris, C. B., & Mumby, P. J. (2014). Consistency and inconsistency in  
538 multispecies population network dynamics of coral reef ecosystems. *Marine*  
539 *Ecology Progress Series*, 499, 1-18.
- 540 Howells, E. J., Abrego D., Meyer E., Kirk N. L. & Burt J. A. (2016). Host adaptation and  
541 unexpected symbiont partners enable reef-building corals to tolerate extreme  
542 temperatures. *Global Change Biology*, 22, 2702-2714.
- 543 Irisson, J. O., Paris, C. B., Guigand, C., & Planes, S. (2010). Vertical distribution and  
544 ontogenetic “migration” in coral reef fish larvae. *Limnology and Oceanography*,  
545 55, 909–919.
- 546 Kaymaram, F., Hossainy, S. A., Darvishi, M., Talebzadeh, S. A., & Sadeghi, M. S.  
547 (2010). Reproduction and spawning patterns of the *Scomberomorus commerson*  
548 in the Iranian coastal waters of the Persian Gulf & Oman Sea. *Iranian Journal of*  
549 *Fisheries Sciences*, 9, 233-244.
- 550 Kemp, J. M. (1998). Zoogeography of the coral reef fishes of the Socotra Archipelago.  
551 *Journal of Biogeography*, 25, 919–933.
- 552 Ketchum, R. N., Smith, E. G., DeBiase, M. B., Vaughan, G. O., McParland, D., Leach,  
553 W. B., ... Reitzel, A. M. (2020). Population genomic analyses of the sea urchin  
554 *Echinometra* sp. EZ across an extreme environmental gradient. *Genome biology*  
555 *and evolution*.
- 556 Lett, C., Veitch, J., van der Lingen, C. D., & Hutchings, L. (2007). Assessment of an  
557 environmental barrier to transport of ichthyoplankton from the southern to the  
558 northern Benguela ecosystems. *Marine Ecology Progress Series*, 347, 247–259.
- 559 Lindeman, K. C., Richards, W. J., Lyczkowski-Shultz, J., Drass, D. M., Paris, C. B., Leis,  
560 J. M., Lara, M., & Comyns, B. H. (2005). Lutjanidae: snappers. In Richards, W. J.  
561 (Ed.), *Early stages of Atlantic fishes* (pp. 1549–1586). CRC Press.
- 562 McClanahan TR, & Muthiga N. A. (2007). Chapter 15 Ecology of *Echinometra*. In:  
563 Lawrence JM, editor. *Developments in Aquaculture and Fisheries Science*:  
564 Elsevier. p. 297-317.
- 565 McIlwain, J., Hermosa, G. V., Claereboudt, M., Al-Oufi, H. S., & Al-Awi, M. (2006).  
566 Spawning and reproductive patterns of six exploited finfish species from the  
567 Arabian Sea, Sultanate of Oman. *Journal of Applied Ichthyology*, 22, 167-176.
- 568 Morgan, S. G., Fisher, J. L., McAfee, S. T., Largier, J. L., & Halle, C. M. (2012). Limited  
569 recruitment during relaxation events: larval advection and behavior in an  
570 upwelling system. *Limnology and Oceanography*, 57, 457-470.
- 571 Munday, P. L., Leis, J. M., Lough, J. M., Paris, C. B., Kingsford, M. J., Berumen, M. L.,  
572 & Lambrechts, J. (2009). Climate change and coral reef connectivity. *Coral reefs*,  
573 28, 379-395.
- 574 Nanninga, G. B., Saenz-Agudelo, P., Manica, A., & Berumen, M. L. (2014).  
575 Environmental gradients predict the genetic population structure of a coral reef  
576 fish in the Red Sea. *Molecular Ecology*, 23, 591–602.

- 577 Paris, C. B., & Cowen, R. K. (2004). Direct evidence of a biophysical retention  
578 mechanism for coral reef fish larvae. *Limnology and Oceanography*, 49, 1964–  
579 1979.
- 580 Paris, C. B., Helgers, J., Sebille, E., & Srinivasan, A. (2013). Connectivity Modeling  
581 System: A probabilistic modeling tool for the multi-scale tracking of biotic and  
582 abiotic variability in the ocean. *Environmental Modelling & Software*, 42, 47-54.
- 583 Parrish, H. R., Nelson, C. S., & Bakun, A. (1981). Transport mechanisms and  
584 reproductive success of fishes in the California current. *Biological Oceanography*,  
585 1, 175-203.
- 586 Priest, M. A., DiBattista, J. D., McIlwain, J. L., Taylor, B. M., Hussey, N. E., &  
587 Berumen, M. L. (2016). A bridge too far: dispersal barriers and cryptic speciation  
588 in an Arabian Peninsula grouper (*Cephalopholis hemistiktos*). *Journal of*  
589 *Biogeography*, 43, 820–832.
- 590 Rocha, L. A. (2003). Patterns of distribution and processes of speciation in Brazilian reef  
591 fishes. *Journal of Biogeography*, 30, 1161–1171.
- 592 Saenz-Agudelo, P., DiBattista, J. D., Piatek, M. J., Gaither, M. R., Harrison, H. B.,  
593 Nanninga, G. B., & Berumen, M. L. (2015). Seascape genetics along  
594 environmental gradients in the Arabian Peninsula: insights from ddRAD  
595 sequencing of anemonefishes. *Molecular Ecology*, 24, 6241–6255.
- 596 Sheppard, C. R. C., & Salm, R. V. (1988). Reef and coral communities of Oman, with a  
597 description of a new coral species (Order Scleractinia, genus *Acanthastrea*).  
598 *Journal of Natural History*, 22, 263-279.
- 599 Shetye, S. R., Gouveia, A. D., & Shenoi, S. C. (1994). Circulation and water masses of  
600 the Arabian Sea. *Proceedings of the Indian Academy of Sciences*, 103, 107-123.
- 601 Smeed, D. A. (2004). Exchange through the Bab el Mandab. *Deep-Sea Research II*, 51,  
602 455–474.
- 603 Thresher, R. E., & Brothers, E. B. (1985). Reproductive ecology and biogeography of  
604 Indo-West Pacific angelfishes. *Evolution*. 39: 878-887.
- 605 Torquato, F. O., Range, P., Ben-Hamadou, R., Sigsgaard, E. E., Thomsen, P. F., Riera,  
606 R., ... Møller, P. R. (2019). Consequences of marine barriers on genetic diversity  
607 of the coral-specialist yellowbar angelfish from the western Indian Ocean.  
608 *Ecology and Evolution*, 9, 11215-11226.
- 609 Treml, E. A., Roberts, J. J., Chao, Y., Halpin, P. N., Possingham, H. P. & Riginos, C.  
610 (2012). Reproductive Output and Duration of the Pelagic Larval Stage Determine  
611 Seascape-Wide Connectivity of Marine Populations. *Integrative and Comparative*  
612 *Biology*, 52, 525–537.
- 613 Treml, E. A., Roberts, J., Halpin, P. N., Possingham, H. P., & Riginos, C. (2015). The  
614 emergent geography of biophysical dispersal barriers across the Indo-West  
615 Pacific. *Diversity and Distributions*, 21, 465–476.
- 616 UNEP-WCMC, WorldFish Centre, WRI, TNC (2010). Global distribution of warm-water  
617 coral reefs, compiled from multiple sources including the Millennium Coral Reef  
618 Mapping Project. Version 3.0. Includes contributions from IMaRS-USF and IRD  
619 (2005), IMaRS-USF (2005) and Spalding et al. (2001). UN Environment World  
620 Conservation Monitoring Centre, Cambridge/UK. URL: [http://data.unep-](http://data.unep-wcmc.org/datasets/1)  
621 [wcmc.org/datasets/1](http://data.unep-wcmc.org/datasets/1).

622 van Herwerden, L., McIlwain, J., Al-Oufi, H., Al-Amry, W., & Reyes, A. (2006).  
623 Development and application of microsatellite markers for *Scomberomorus*  
624 *commerson* (Perciformes; Teleostei) to a population genetic study of Arabian  
625 Peninsula stocks. *Fisheries Research*, 79, 258-266.

626 Zuur, A. F., Ieno, E. N., & Elphick, C. S. (2010). A protocol for data exploration to avoid  
627 common statistical problems. *Methods in Ecology and Evolution*, 1, 3-14.

628

629

### 630 BIOSKETCH

631 **Felipe Torquato** is interested in the origin and distribution of biodiversity at all  
632 ecological levels. This work represents a component of his PhD work at the Natural  
633 History Museum of Denmark under the supervision of Peter R. Møller.

634

635 **Author contributions:** FT and PRM conceived the idea; FT designed and ran the  
636 biophysical models, and led the writing with assistance from PRM.

637

638

639

### 640 TABLES

641

642

643 **TABLE 1.** Range in biological parameter values to characterize the 72 hypothetical  
644 model taxa.

645

| PLD (days) | Spawning periodicity | Larval mortality | Vertical migration | Reproductive output |
|------------|----------------------|------------------|--------------------|---------------------|
| 20         | Annual               | High             | Yes                | High                |
| 30         | Summer)              | Low              | No                 | Low                 |
| 40         | Winter)              |                  |                    |                     |

646

647

648

### 649 FIGURES

650

#### 651 Legends

652

653 **FIGURE 1.** Study region. Northwestern Indian Ocean with previously described barriers  
654 depicted as shaded line in left panel. (a) Bab-el-Mandeb Strait, (b) Upwelling off Oman  
655 and (c) Strait of Hormuz. Arrows in the right panel represent prevailing currents in the  
656 northwestern Indian Ocean

657

658 **FIGURE 2.** Results on the beta regression models showing the effects of the biological  
659 traits on the permeability of the Bab-el-Mandeb Strait. The red triangles represent the  
660 mean value. Capital and lowercase letters distinguish the direction showed in the legend,  
661 while differences between letters (a, b and c) indicate significant differences ( $p < 0.05$ ).

662 **FIGURE 3.** Results on the beta regression models showing the effects of the biological  
663 traits on the permeability of the Strait of Hormuz. The red triangles represent the mean  
664 value. Capital and lowercase letters distinguish the direction showed in the legend, while  
665 differences between letters (a, b and c) indicate significant differences ( $p < 0.05$ ).

666  
667 **FIGURE 4.** Results on the beta regression models showing the effects of the biological  
668 traits on the self-recruitment along Omani coast. The red triangles represent the mean  
669 value. Differences between letters (a, b and c) indicate significant differences ( $p < 0.05$ ).

670  
671 **FIGURE 5.** Modeled dispersal paths of epipelagic virtual larvae with larval duration of  
672 40 days released in the wintertime from (a) the Red Sea, (b) Gulf of Aden, (c) Arabian  
673 Sea, (d) Sea of Oman and (e) Arabian Gulf. For sake of visualization one larva was  
674 released from each habitat cell (total of 181) per day in 2015. The distances travelled by  
675 the larvae are represented in (f).

676  
677 **FIGURE 6.** Modeled dispersal paths of epipelagic virtual larvae with larval duration of  
678 40 days released in the summertime from (a) the Red Sea, (b) Gulf of Aden, (c) Arabian  
679 Sea, (d) Sea of Oman and (e) Arabian Gulf. For sake of visualization one ne larva was  
680 released from each habitat cell (total of 181) per day in 2015. The distances travelled by  
681 the larvae are represented in (f).

682  
683  
684  
685  
686  
687 **FIGURE 1.**

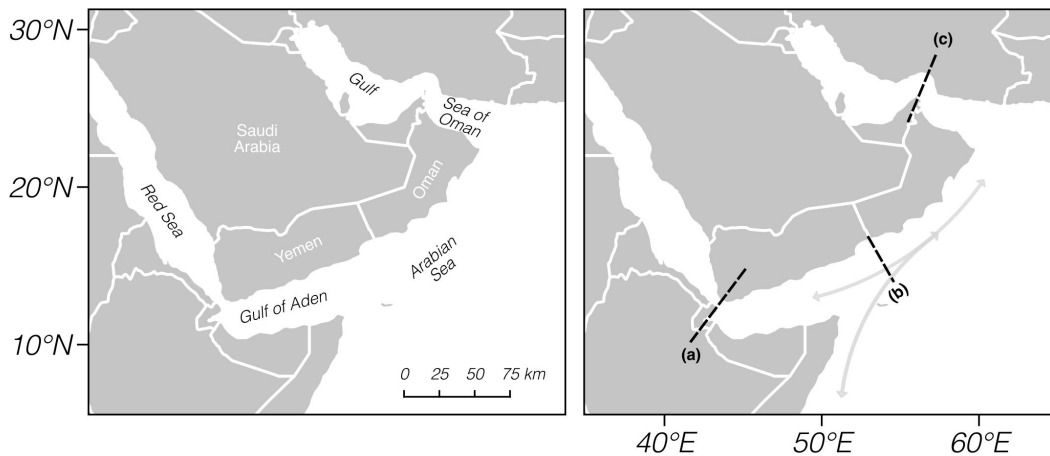

688  
689  
690  
691  
692  
693  
694  
695  
696



697 **FIGURE 2.**  
698  
699

## Bab-el-Mandeb Strait

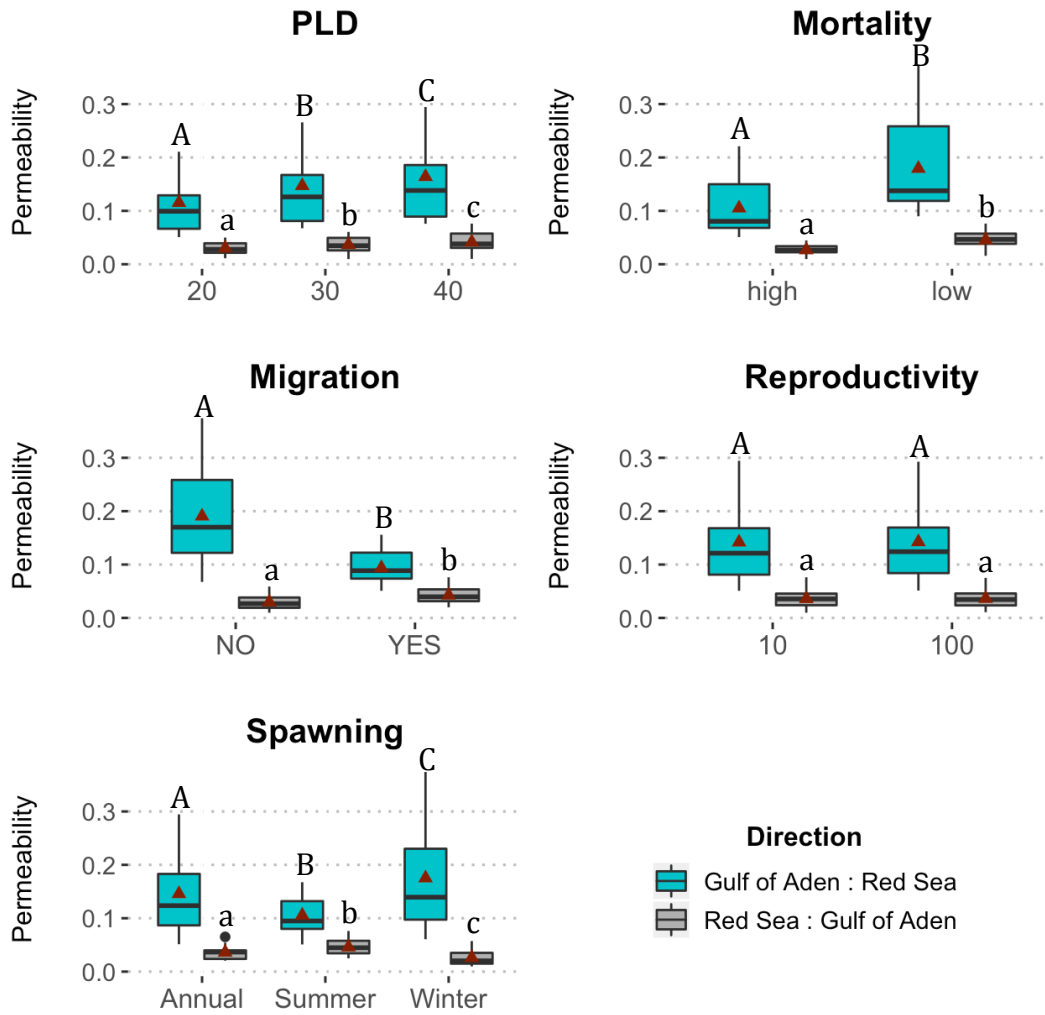

700  
701  
702  
703  
704  
705  
706  
707  
708  
709  
710  
711  
712  
713  
714

715 **FIGURE 3.**  
716

## Strait of Hormuz

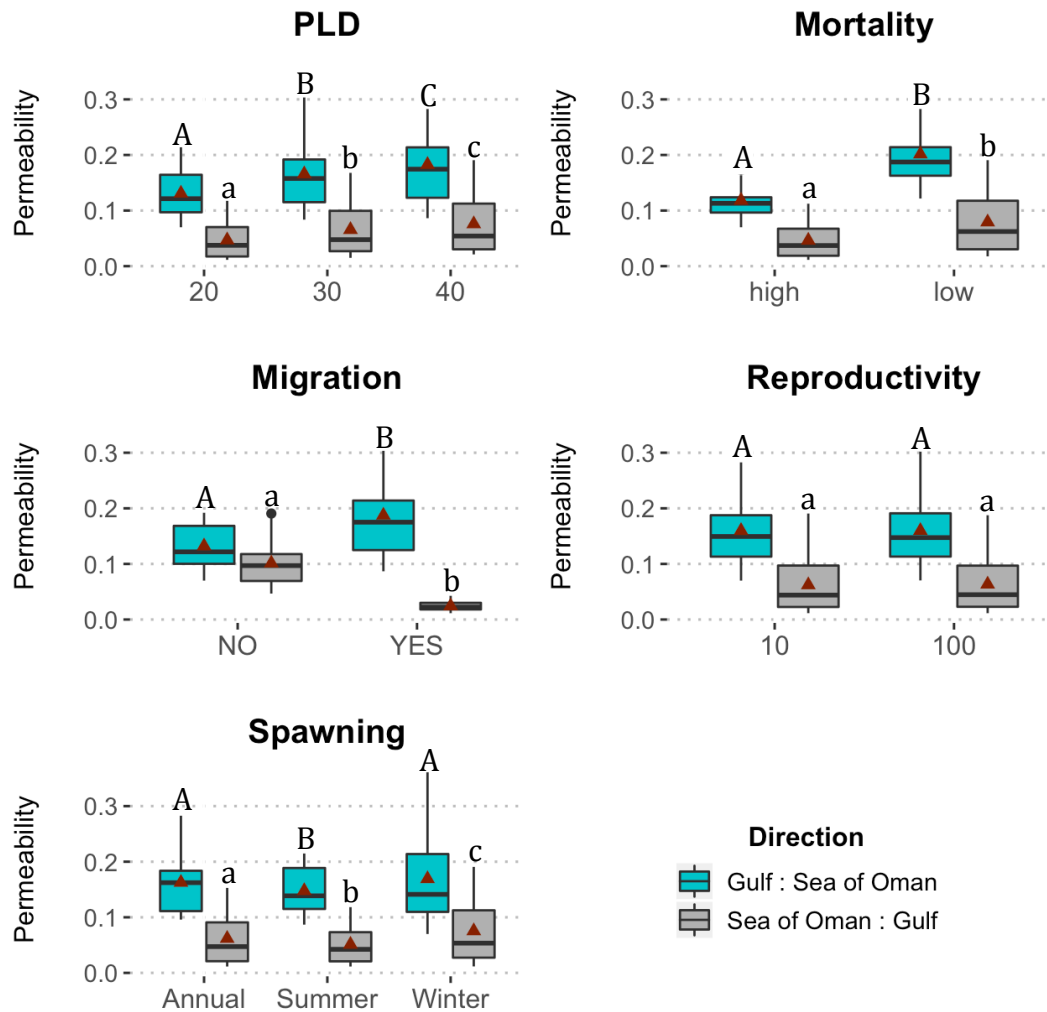

717  
718  
719  
720  
721  
722  
723  
724  
725  
726  
727  
728  
729  
730  
731  
732

733 **FIGURE 4.**

## Upwelling off Oman

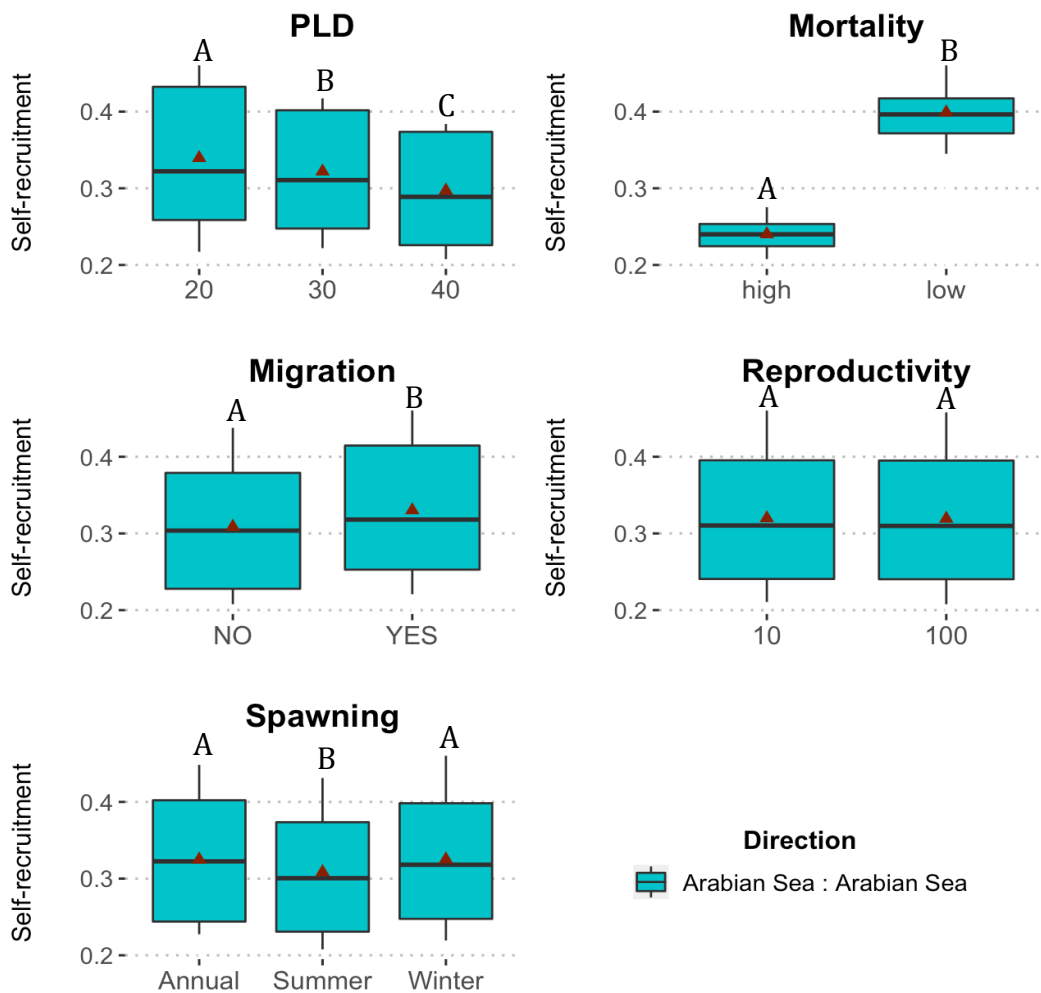

734  
735  
736  
737  
738  
739  
740  
741  
742  
743  
744  
745  
746  
747  
748  
749

750 **FIGURE 5.**  
751

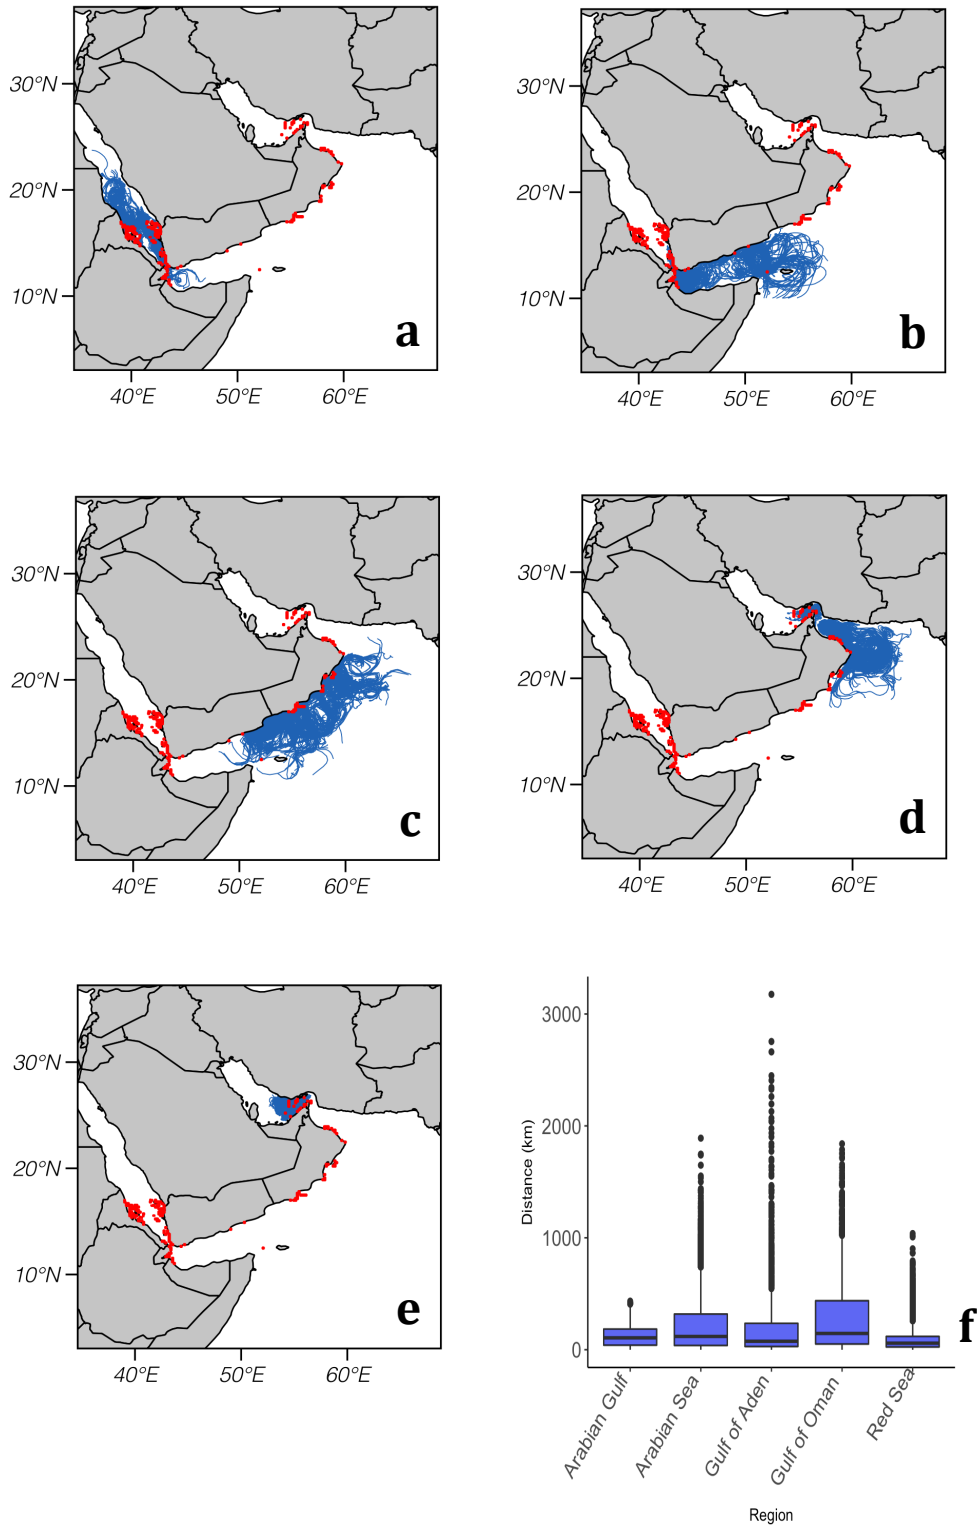

752  
753  
754

755 **FIGURE 6.**  
756

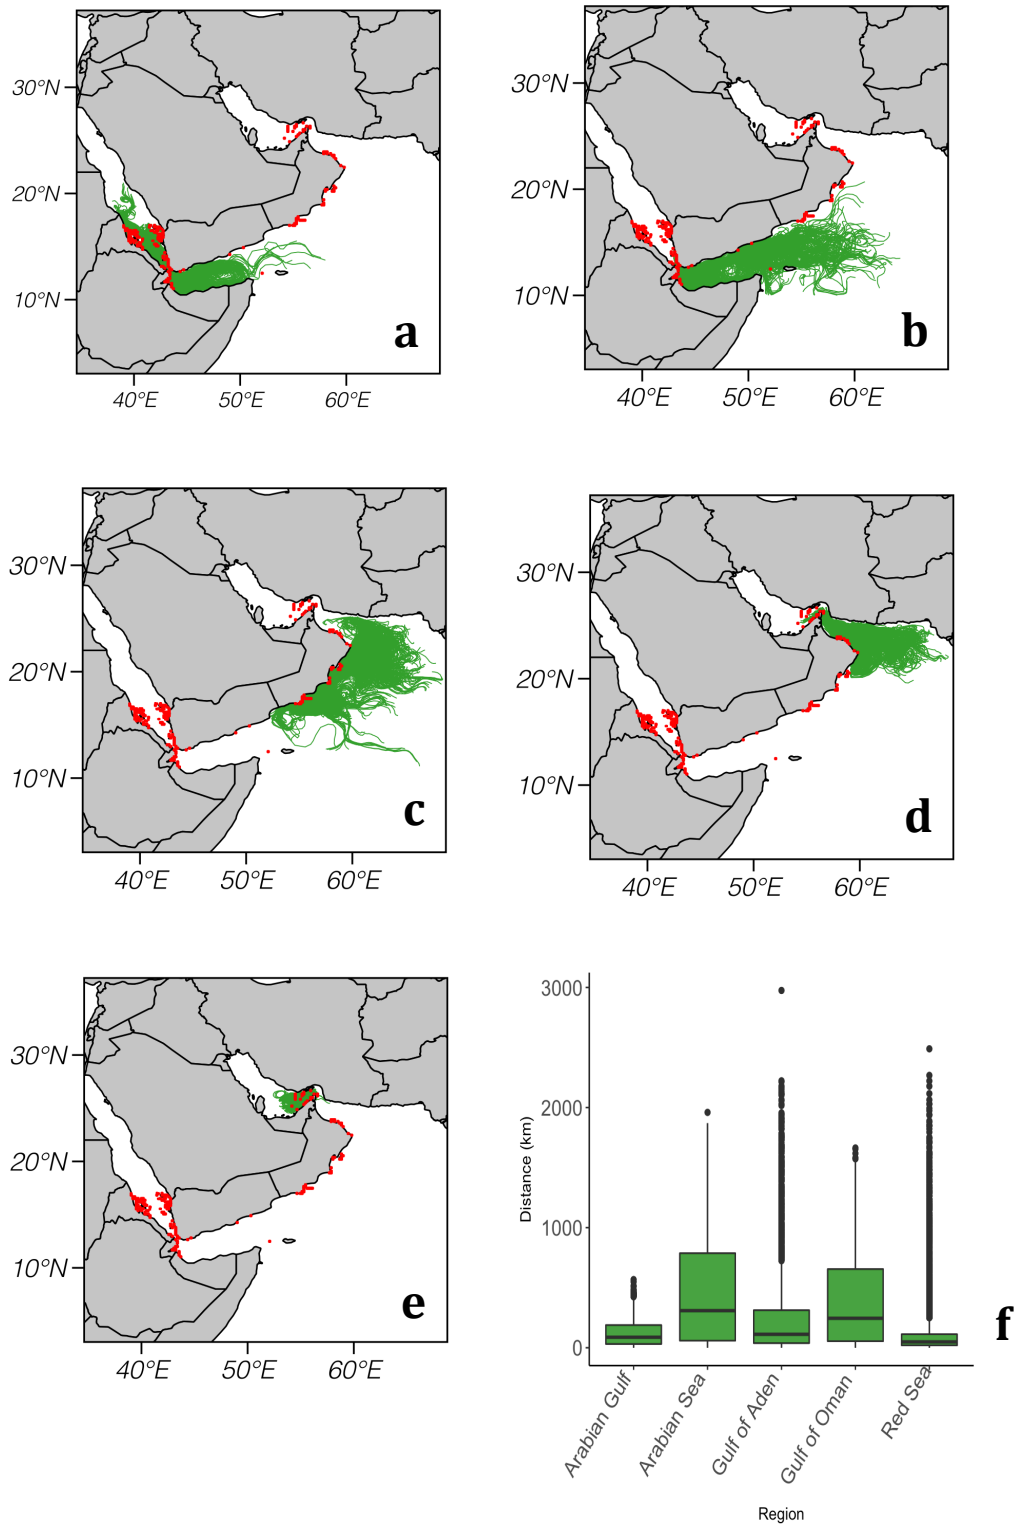

757
